# Supplementary material for: Combination Effects of Metformin and a Mixture of Lemon Balm and Dandelion on High-Fat Diet-Induced Metabolic Alterations in Mice
Source: MDPI journal article supplement (doi:10.3390/antiox11030580), 2022-03-18
Supplement: s1 [file s1]

**Table S1. Primers used for RT-qPCR analysis**

| Targets (GenBank No.)         | Sequence (5' to 3')                                                          |
|-------------------------------|------------------------------------------------------------------------------|
| ACC1 (NM133360)               | Forward: GCCATTGGTATTGGGGCTTAC<br>Reverse: CCCGACCAAGGACTTTGTTG              |
| Adiponectin (NM009605)        | Forward: CCCAAGGGAACTTGTGCAGGTTGGATG<br>Reverse: GTTGGTATCATGGTAGAGAAGAAAGCC |
| AMPK $\alpha$ 1 (XM011245321) | Forward: AAGCCGACCCAATGACATCA<br>Reverse: CTTCTTCGTACACGCAAAT                |
| AMPK $\alpha$ 2 (NM178143)    | Forward: GATGATGAGGTGGTGGGA<br>Reverse: GCCGAGGACAAAGTGC                     |
| C/EBP $\alpha$ (NM001287523)  | Forward: TGGACAAGAACAGCAACGAGTAC<br>Reverse: CGGTCATTGTCACTGGTCAACT          |
| C/EBP $\beta$ (NM001287739)   | Forward: AAGCTGAGCGACGAGTACAAGA<br>Reverse: GTCAGCTCCAGCACCTTGTG             |
| FAS (NM007988)                | Forward: GCTGCGGAACTTCAGGAAAT<br>Reverse: AGAGACGTGTCACTCCTGGACTT            |
| Leptin (NM008493)             | Forward: CCAAAACCCTCATCAAGACC<br>Reverse: GTCCAAGTGTGAAGAATGTCCC             |
| PPAR $\alpha$ (NM011144)      | Forward: ATGCCAGTACTGCCGTTTTC<br>Reverse: GGCCTTGACCTTGTTTCATGT              |
| PPAR $\gamma$ (NM001127330)   | Forward: AGTGGAGACCGCCCAGG<br>Reverse: GCAGCAGGTTGTCTTGGATGT                 |
| SREBP1c (XM006532714)         | Forward: AGCCTGGCCATCTGTGAGAA<br>Reverse: CAGACTGGTACGGGCCACAA               |
| UCP2 (NM011671)               | Forward: CCGCATTGGCCTCTACGACTCT<br>Reverse: CCCCGAAGGCAGAAGTGAAGTG           |
| GAPDH (NM008084)              | Forward: CATCTTCCAGGAGCGAGACC<br>Reverse: TCCACCACCCTGTTGCTGTA               |

ACC1 = acetyl-CoA carboxylase 1, AMPK = 5' adenosine monophosphate-activated protein kinase, C/EBP = CCAAT-enhancer-binding protein, FAS = fatty acid synthase, GAPDH = glyceraldehydes 3-phosphate dehydrogenase, PPAR = peroxisome proliferator-activated receptor, RT-PCR = reverse transcription polymerase chain reaction, SREBP = sterol regulatory element-binding protein, UCP = mitochondrial uncoupling protein.
